# Supplementary material for: Formation and harvesting of thick pancreatic β-cell sheets on a highly O2-permeable plate modified with poly(N-isopropylacrylamide)
Source: Royal Society of Chemistry journal article supplement (doi:10.1039/c3bm00123g), 2013-01-01
Supplement: c3bm00123g.pdf [file c3bm00123g.pdf]

Supporting Information Paragraph.

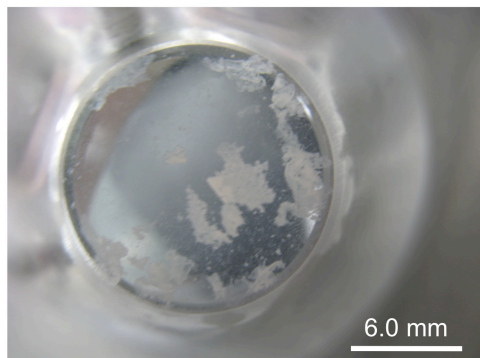

Figure S1. A picture of MIN6-m9 cells in the  $O_2+$ /PNIPA-PDMS plate after filling with culture medium at 4 °C.
